# Supplementary material for: Impact of the expression of thymidylate synthase and dihydropyrimidine dehydrogenase genes on survival in stage II/III gastric cancer
Source: PubMed Central journal article supplement (PMC4511074; doi:10.1007/s10120-014-0413-8), 2014-08-12
Supplement: 10120_2014_413_MOESM2_ESM.pdf [file 10120_2014_413_MOESM2_ESM.pdf]

Supplementary Table S1. Compliance with REMARK guidelines

| Introduction             |                                                                                                                                                                                                                                            |
|--------------------------|--------------------------------------------------------------------------------------------------------------------------------------------------------------------------------------------------------------------------------------------|
|                          | Markers analyzed are enzymes involved in pyrimidine metabolism such as TS, DPD, TP and OPRT                                                                                                                                                |
|                          | Objectives; to determine whether those markers are predictive for benefit from S-1 or prognostic                                                                                                                                           |
|                          | Hypotheses; low TS and high OPRT expression are associated with enhanced benefit from S-1 and high TS, DPD and TP expression are associated with negative prognosis                                                                        |
| Materials and Methods    |                                                                                                                                                                                                                                            |
| Patients                 | Patients with stage II/III gastric cancer randomized to adjuvant treatment with S-1 after surgery (D2 dissection) or surgery-only                                                                                                          |
| Specimen characteristics | Formalin-fixed, paraffin-embedded surgical specimens                                                                                                                                                                                       |
| Assay method             | Gene expression levels were determined by TaqMan real-time PCR in manual microdissected tumour specimens and normalized to $\beta$ -actin expression as an endogenous reference gene                                                       |
| Study design             | Retrospective analysis of paraffin-embedded material from patients treated within a prospective randomized study                                                                                                                           |
|                          | Clinical end-point of overall survival (OS) and relapse-free survival (RFS) used                                                                                                                                                           |
|                          | The expression levels of each gene were categorized as low or high at the 33.3 <sup>rd</sup> , 50 <sup>th</sup> or 66.7 <sup>th</sup> percentile                                                                                           |
|                          | Sample size estimated by the availability of tissue from the 634 (60%) randomized patients enrolled in the ACTS-GC study; with the observed number of deaths power to detect interaction effects (ratio of treatment HRs) was ~80% for 0.5 |
| Statistical methods      | Categorical data analysis was conducted using either the chi-square test or the Wilcoxon test                                                                                                                                              |
|                          | Univariate and multivariate analysis using Cox's proportional hazards regression model to assess the independent prognostic value of the expression levels of each gene                                                                    |

|                           |                                                                                                                                                                                              |
|---------------------------|----------------------------------------------------------------------------------------------------------------------------------------------------------------------------------------------|
|                           | Prognostic value of the expression levels of TS and DPD assessed in each treatment arm separately using Kaplan–Meier survival curves compared with the log-rank test                         |
|                           | Predictive value the expression levels of TS and DPD assessed using test for interaction of the subgroup treatment HRs, displayed in forest plots                                            |
| <b>Results</b>            |                                                                                                                                                                                              |
| Data                      | Flow of patients detailed in Figure 1; baseline characteristics of biomarker study sub-population for gene expression compared with total population of ACTS-GC in Table 1                   |
| Analysis and presentation | Distribution of the expression levels of each gene and association of them with IHC scores displayed in Supplementary Figures S1 and S3, available at online                                 |
|                           | Representative examples of gastric carcinomas immunochemically stained for TS, DPD, TP and OPRT displayed in Supplementary Figures S2, available at online                                   |
|                           | Univariate and multivariate analyses results displayed in Table 2-4                                                                                                                          |
|                           | Kaplan–Meier survival curves and forest plots for effect of TS and DPD on survival in Figure 2                                                                                               |
|                           | Correlations between cutoff values used for stratification and <i>P</i> values from log-rank tests for TS and DPD gene expression displayed in Supplementary Figures S4, available at online |
| <b>Discussion</b>         |                                                                                                                                                                                              |
|                           | High TS and DPD expression were associated with positive prognosis only in S-1 group and enhanced benefit from S-1. Study limited by a single cohort analysis                                |
